# Supplementary material for: Global scale evaluation of precipitation datasets for hydrological modelling
Source: Copernicus journal article supplement (doi:10.5194/hess-2023-251), 2023-10-26
Supplement: Supplementary file 1 [file hess-2023-251-supplement.pdf]

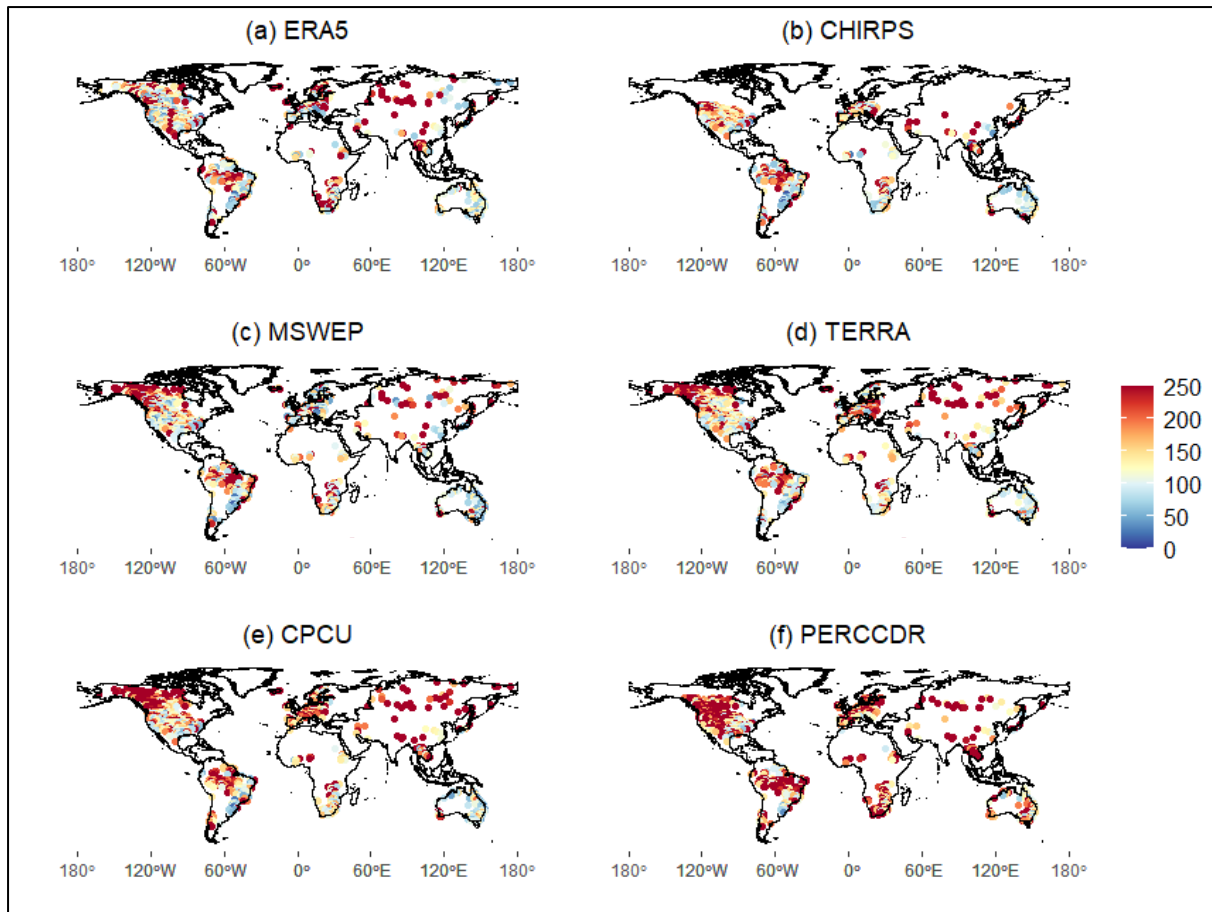

**Figure S1: Normalised RMSE between observed and simulated annual discharge based on a) ERA5, b) CHIRPS, c) MSWEP, d) TERRA, e) CPCU, and f) PERCCDR.**

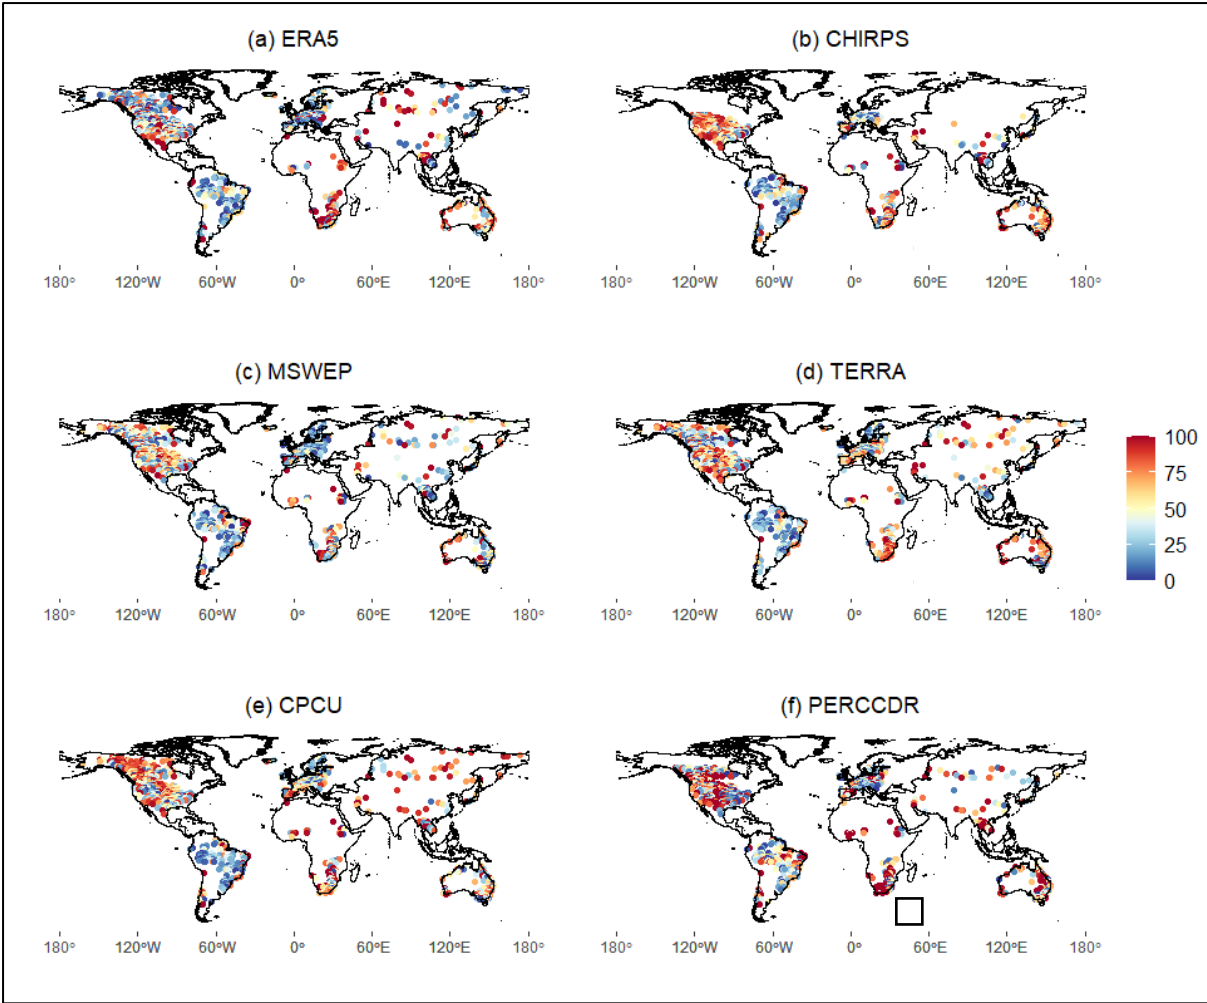

**Figure S2: Pbias between observed and simulated annual discharge based on a) ERA5, b) CHIRPS, c) MSWEP, d) TERRA, e) CPCU, and f) PERCCDR.**

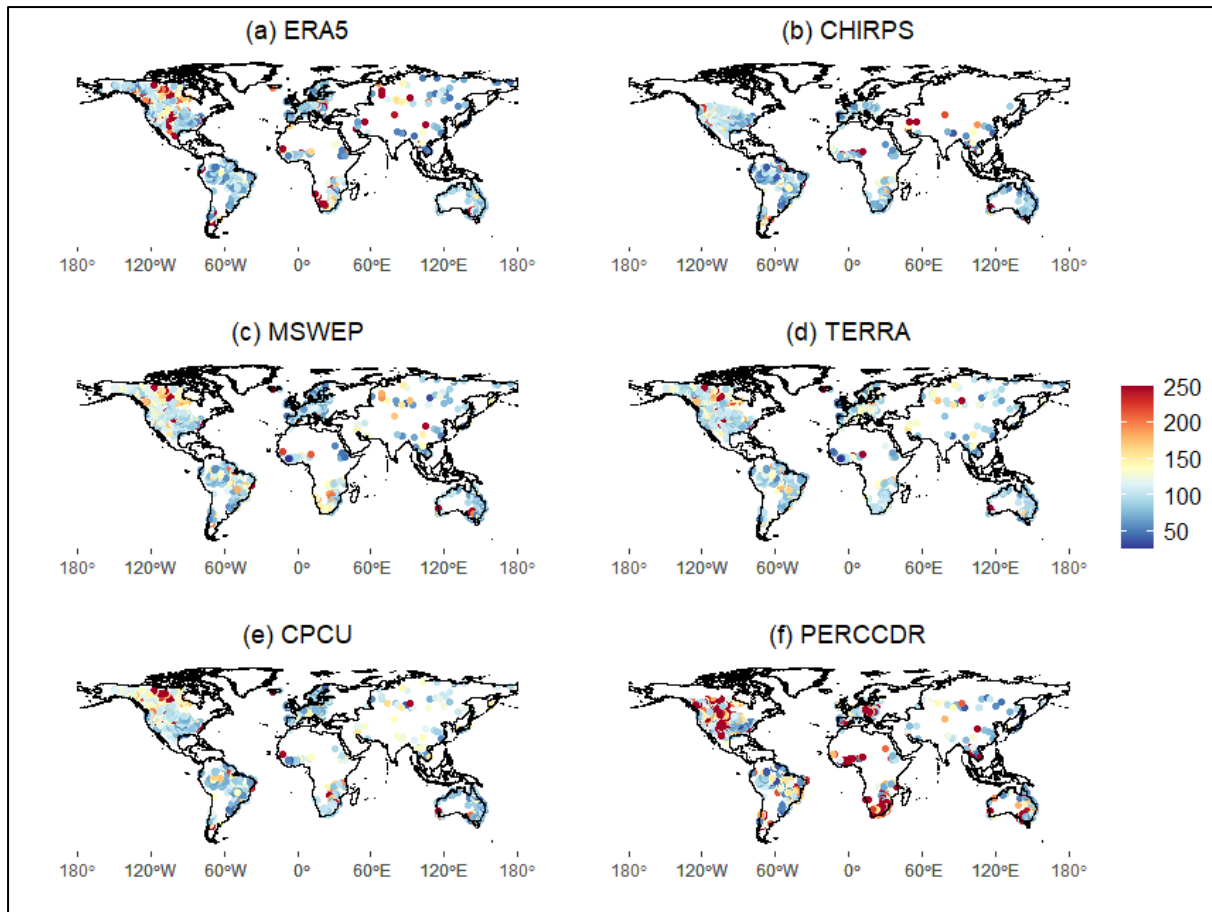

**Figure S3: Normalised RMSE between observed and simulated monthly discharge based on a) ERA5, b) CHIRPS, c) MSWEP, d) TERRA, e) CPCU, and f) PERCCDR.**

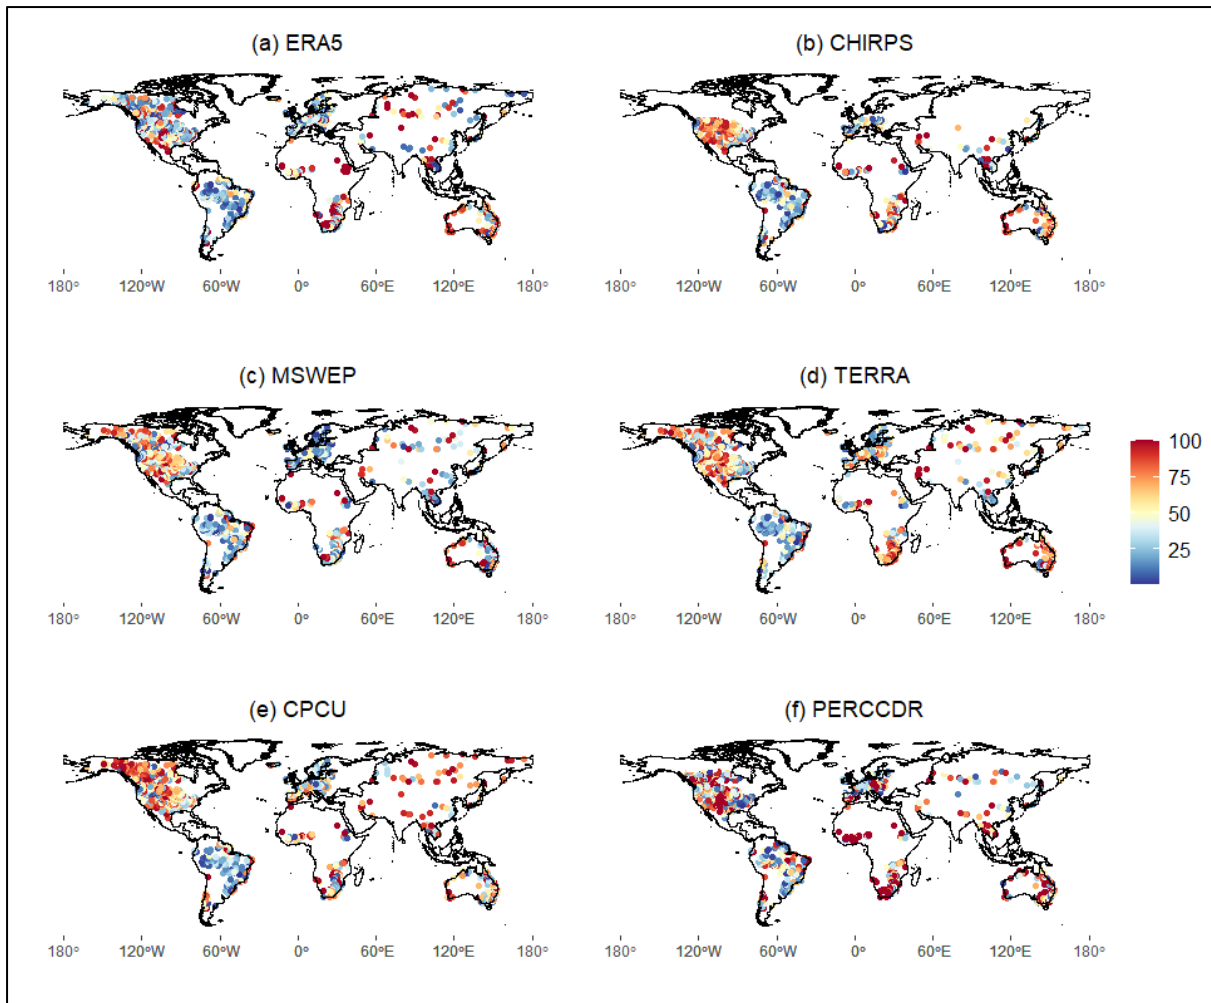

**Figure S4: Pbias between observed and simulated monthly discharge based on a) ERA5, b) CHIRPS, c) MSWEP, d) TERRA, e) CPCU, and f) PERCCDR.**

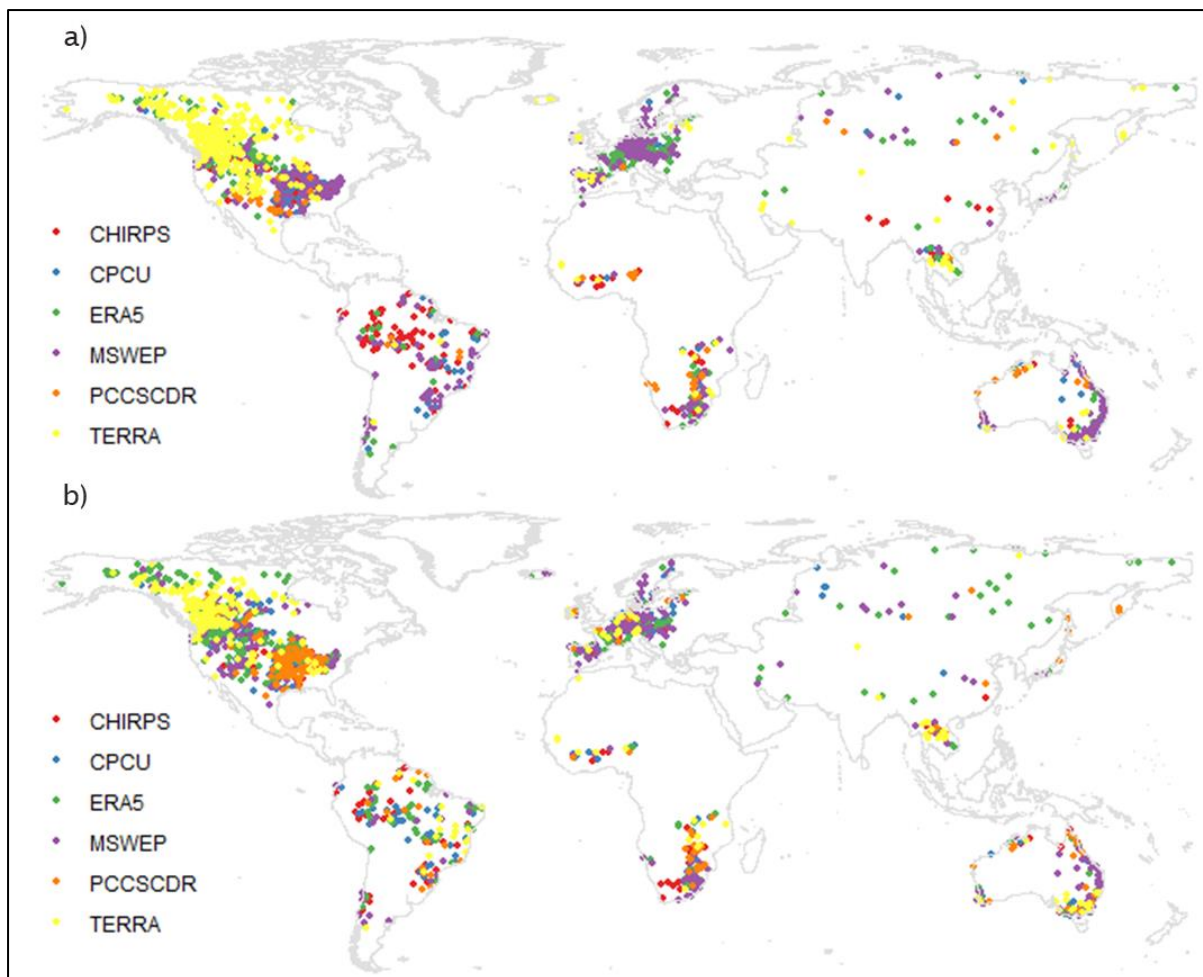

**Figure S5: The best performing precipitation dataset (ERA5, CHIRPS, MSWEP, TERRA , CPCU, and PERCCDR) at each of the observed discharge stations based on monthly CC (a) and KGE (b).**

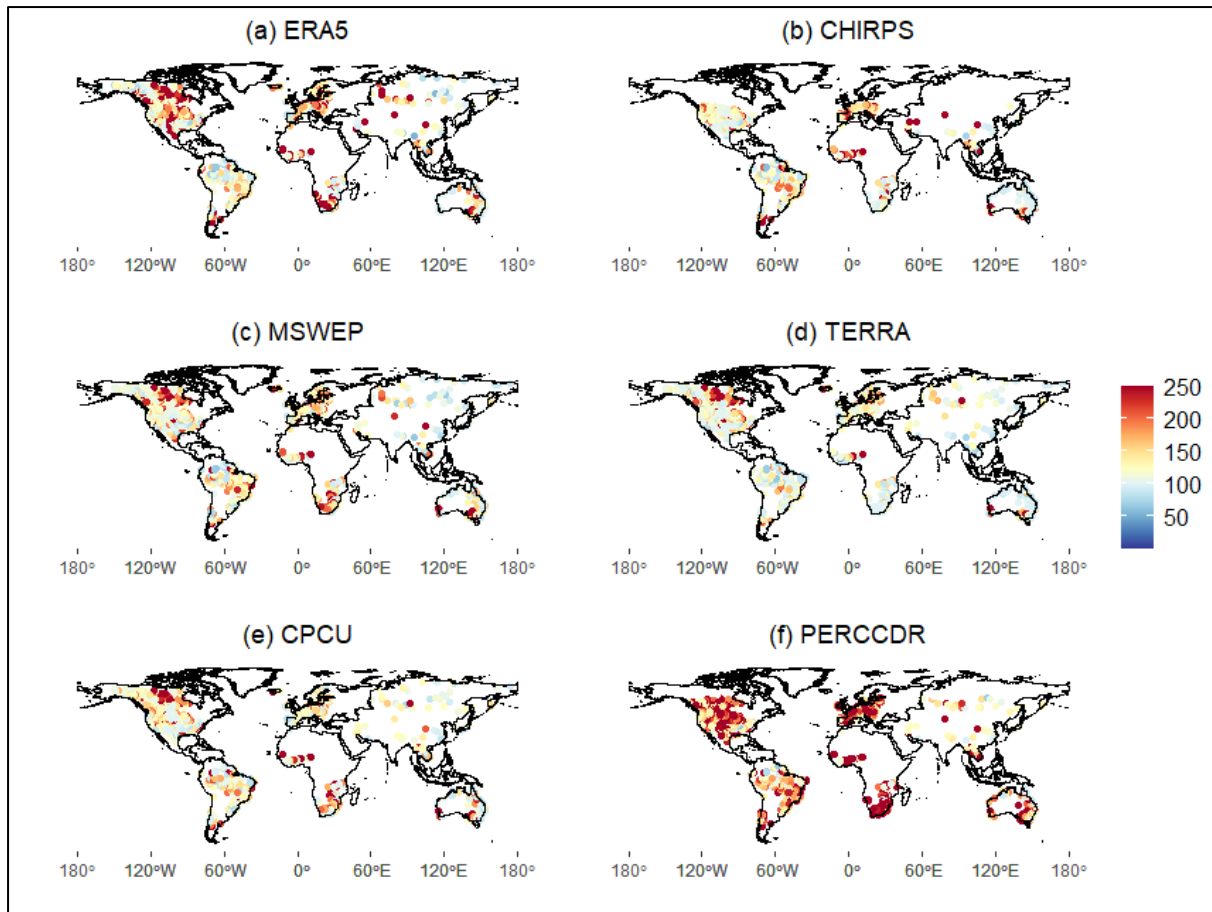

**Figure S6: Normalised RMSE between observed and simulated daily discharge based on a) ERA5, b) CHIRPS, c) MSWEP, d) TERRA, e) CPCU, and f) PERCCDR.**

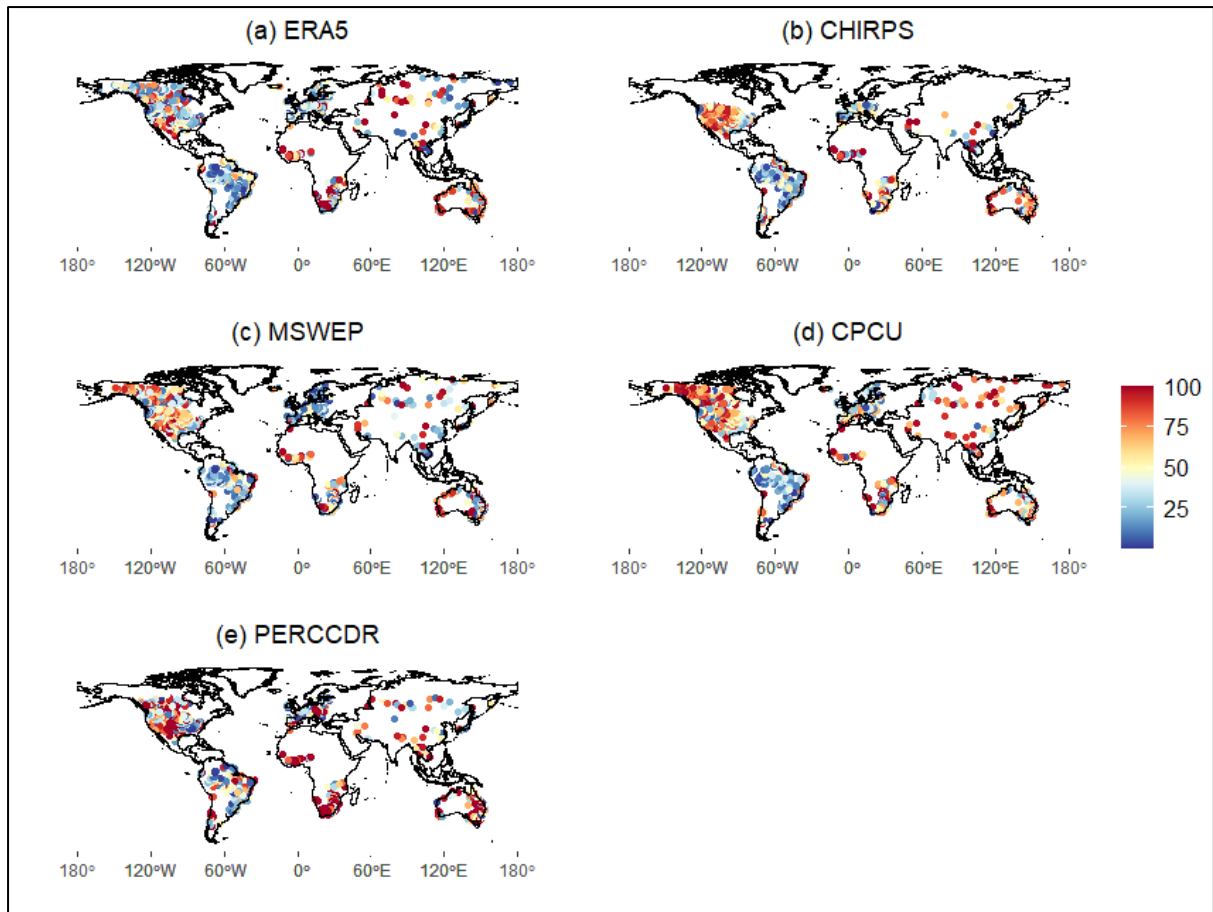

**Figure S7: Pbias between observed and simulated daily discharge based on a) ERA5, b) CHIRPS, c) MSWEP, d) CPCU, and e) PERCCDR.**

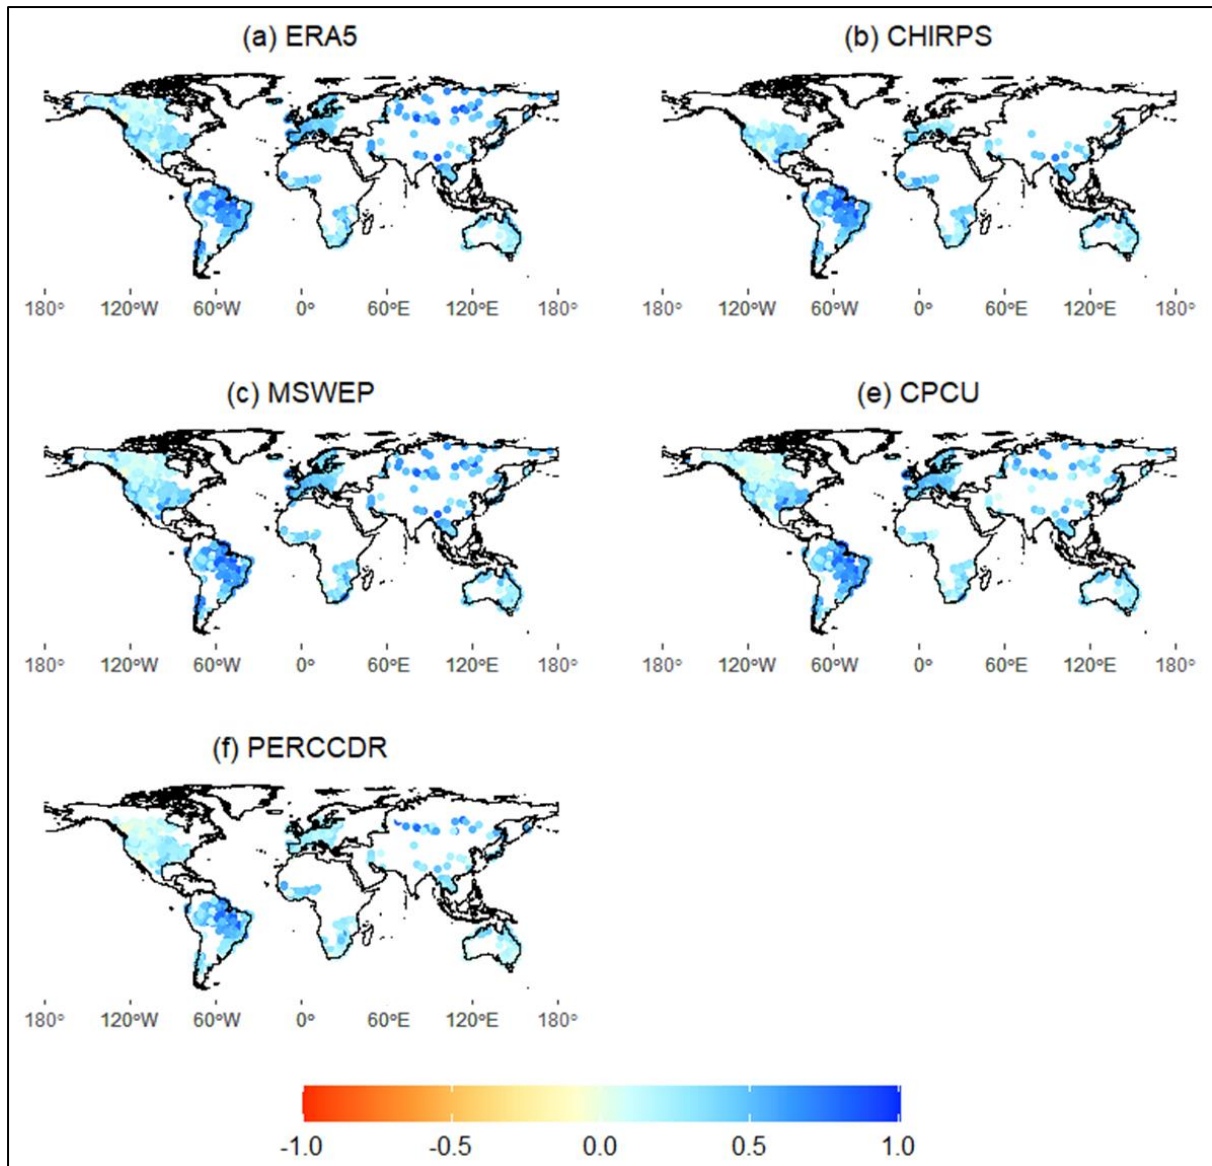

**Figure S8: Correlation (CC) between observed and modelled daily extremes (Q90, low flow) using a) ERA5, b) CHIRPS, c) MSWEP, d) CPCU and e) PERCCDR precipitation datasets.**



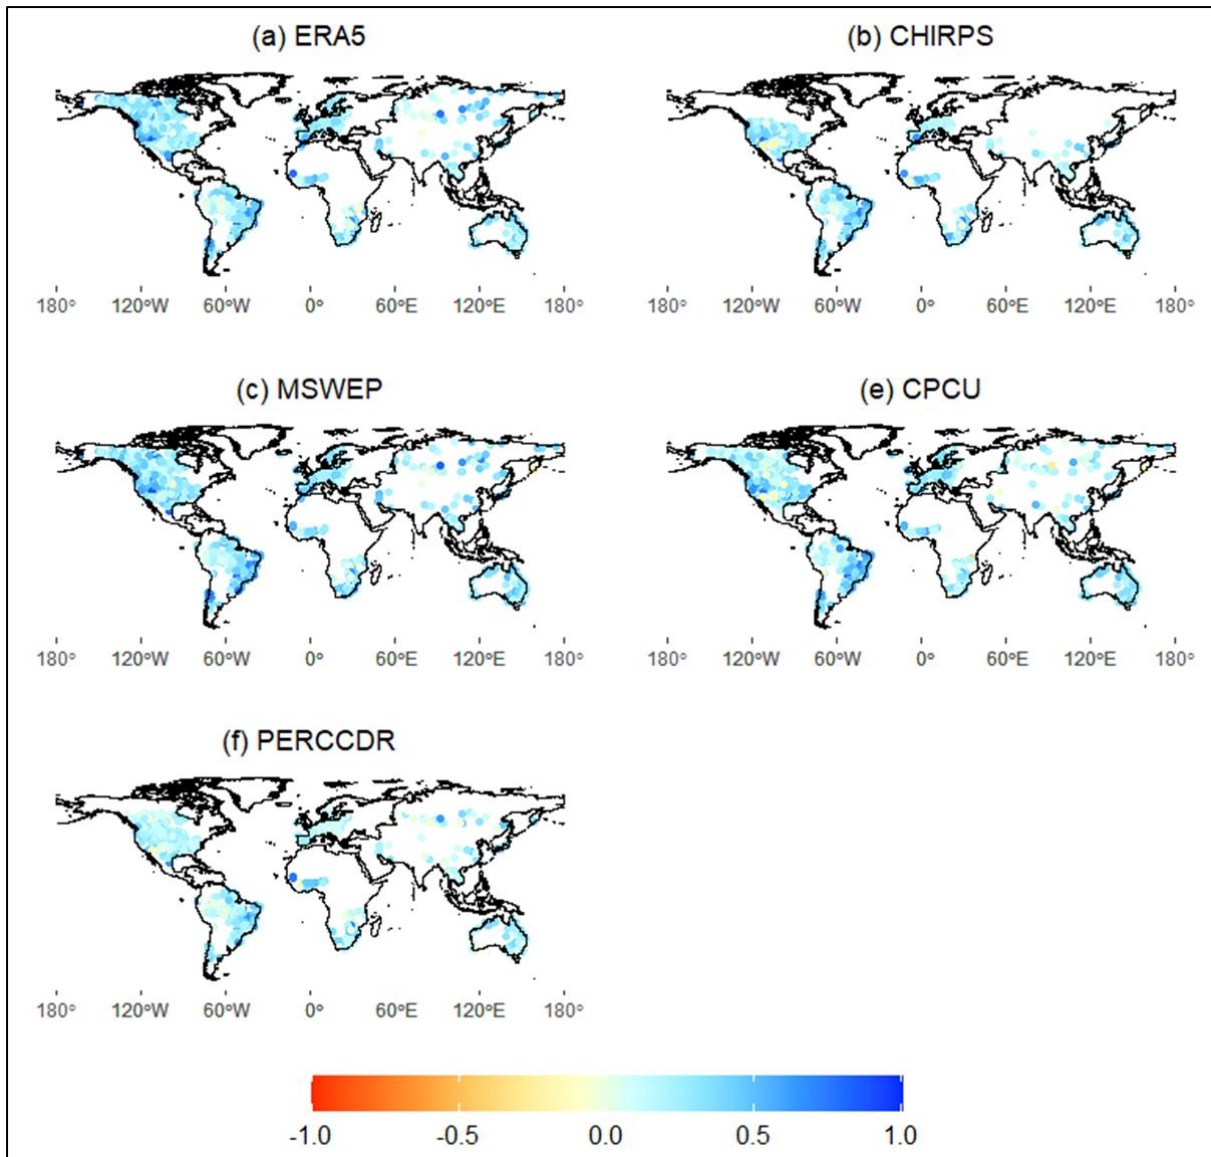

Figure S9: Correlation (CC) between observed and modelled daily extremes (Q10, high flow) using a) ERA5, b) CHIRPS, c) MSWEP, d) CPCU and e) PERCCDR precipitation datasets.
