# Supplementary material for: Global scale evaluation of precipitation datasets for hydrological modelling
Source: Copernicus journal article supplement (doi:10.5194/hess-2023-251), 2023-10-26
Supplement: Supplementary file [file hess-2023-251-AC2-supplement.pdf]

## Reply to Referee #2

We appreciate the reviewer for dedicating their time and providing valuable, detailed feedback. We have diligently addressed all of the comments and discussed them as follows.

In the submitted manuscript, the authors assess the efficacy of six global/near-global precipitation datasets in streamflow modeling across 1825 gauging stations, employing the WBMsed hydrological model. Building upon prior research, this investigation scrutinises precipitation datasets that have either been updated or not been included in previous studies. Notably, the assessment extends beyond the daily time scale, including monthly and annual perspectives, and evaluates the model's proficiency in simulating both high and low flows for each of the selected precipitation sets.

From a linguistic perspective, the manuscript is well-written and exhibits a clear structure. It falls comfortably within the scope of the journal and will capture the interest of members within the hydrological modeling community. However, it is imperative to acknowledge certain significant shortcomings which need to be addressed before the manuscript can be considered for publication.

### Authors' response:

- Thank you for recognizing our efforts and providing feedback to improve the quality of the paper. **For the following general comments, we have provided a detailed answer in the "Specific comments" section.**
1. The methods section is comparatively short with a main focus on the description of the precipitation sets evaluated and it does not provide sufficient detail for reproduction of the study.
    1. Eleven of the authors claim their main contribution to this study was extensive data quality control, however, I cannot find a single sentence mentioning or describing the quality control procedure applied in the methods section.

### Authors' response:

- Thank you for the feedback. We have added more information to the methods section to facilitate the reproduction of the work, including details on the quality control procedure. **Additional information is provided in the 'Specific comments' section.**
2. It is unclear which datasets were used to drive the model as all that is given are two references to previous papers and a rather confusing description of some update applied.

### Authors' response:

- Thank you. We have added a table listing the datasets used to drive the model, in addition to the precipitation datasets, for clarity. **Additional information regarding this is provided in the 'Specific comments' section.**

3. The reader is left guessing as how the mismatch between resolution of the precipitation data and the resolution of the hydrological model was addressed.

Authors' response:

- Thank you. We have addressed the concern by adding a section that explains how the datasets are pre-processed to the same resolution to run the hydrological model at 0.1°. **More details are available in the 'Specific comments' section.**

4. No rationale is given for how and why the 1825 gauging stations were selected for evaluation. Furthermore, the authors do not provide a list containing the GRDC number and/or name of the selected gauging stations, which makes reproduction of this list impossible (maybe this is planned to be provided in electronic form at a later stage?).

Authors' response:

- Thank you for bringing this to our attention. The selection of gauging stations is based on the observed length records to evaluate the modelled discharge. The stations' information, including lat, lon and area, is available from GRDC (<https://portal.grdc.bafg.de/applications/public.html?publicuser=PublicUser#dataDownload/StationCatalogue>), and we are willing to provide the locations if necessary. **More details are available in the 'Specific comments' section.**

2. According to the abstract, the authors want to provide guidance on the selection of precipitation sets for hydrological modelling. They also make an enormous effort and use five different metrics for performance evaluation. Sadly, the manuscript does not provide much beyond the pure quantitative evaluation. Giving a rationale for the selection of those specific metrics and discussing why one/some of them provide a benefit for the evaluation under certain conditions would tremendously improve the manuscript. It would also be of value if the manuscript could discuss the performance within specific climatic zones (e.g tropics vs temperate) as suggested in the abstract.

Authors' response:

- Thank you for the suggestion. We have added a section highlighting the performance of the different precipitation datasets in different regions of the world by selecting large basins in South America (Amazon), Europe (Danube), USA (Mississippi), Africa (Orange), Asia (Mekong), and Australia (Murray-Darling). We have also added a few lines describing the benefit of the selected statistical methods in the discussion section for clarity. **More information is available in the 'Specific comments' section.**

3. The discussion section would benefit from further editing. It contains paragraphs/sentences which would be better placed in other sections (see specific comments below) and it does not discuss any limitations of the study.

Authors' response:

Thank you for providing the edits and suggestions in the discussion section. Based on your recommendations and edits, we have modified the section. We have also added details about the limitations of the study. **Additional information is provided in the 'Specific comments' section.**

4. Presenting maps at a global scale is no easy task and a lot of effort has been put into a substantial number of figures. However, it is very difficult to actually see what is going on. The coloured points often overlap each other and it is not easy to distinguish the colours or to discern the differences between the precipitation sets. Providing maps limited to regions which exhibit major differences between the sets might be a better option. There also seems a consistent problem within the caption where 'yellow' lines or highlights are referred to but the presented colour seems to be more 'orange' or 'red'. Replacing the coloured line with a dashed black line and highlighting the bars in grey would avoid any potential colour confusion. Furthermore, the colour legends seems to miss a title describing what value is actually presented.

Authors' response:

- Thank you for the suggestions and for understanding the challenge of presenting global scale evaluation results. To address your comment, as discussed above, we have now provided detailed maps highlighting the performance differences of various precipitation sets by selecting large river basins in South America, North America, Europe, Asia, Africa, and Australia. We believe this improvement enhances result visibility. Additionally, we have adjusted the colours in each figure and added a colour legend for clarity. **Further details on these modifications can be found in the responses to specific questions.**

### **Specific comments:**

Line 30: The term 'more than 1800' is rather vague and should be changed to the exact number of stations.

Authors' response:

- Thank you. We have changed this to the exact number of stations (i.e., 1825).

Lines 34-37: The sentence seems overly complex. Removing the vague quantification and replacing it by the information in the brackets should address the issue.

Authors' response:

- Thank you for your suggestion. We have revised the sentence in lines 34-37 as recommended.

Line 88: Again, the expression ‘multiple’ is rather vague and should be changed to the exact number of sets evaluated.

Authors’ response:

- Thank you. We have modified this by adding the numbers.

Line 88-91: Listing all those example sets bloats the paragraph. I recommend to remove the list of example sets in the brackets.

Authors’ response:

- Thank you for your suggestion. We have removed the examples as recommended.

Line 92-93: Same as in line 88-91

Authors’ response:

- Thank you for your suggestion. We have removed the examples as recommended.

Lines 86-105: The authors mention Voisin et al. (2008) but do not give any information on the scope of this cited study or how it relates to the presented work.

Authors’ response:

- Thank you for bringing this to our attention. Voisin et al. (2008) conducted a global-scale evaluation of precipitation (ERA-40 and GPCP) for hydrological modelling, providing relevant context for our study. We have added a line to explain this in the manuscript.

Line 121: I suggest changing the header to ‘Precipitation sets’

Authors’ response:

- Thank you for the suggestion. We have changed the header as recommended (“Precipitation datasets”).

Line 122: What is the rationale behind choosing datasets of length >30 years? Why those specific six sets?

Authors’ response:

- As we explained in the introduction, we have tried to build on the work by Beck et al., (2017a). Based on Beck et al., (2017a), we excluded the datasets with very low performance and selected datasets with the highest performance, such as older versions MSWEP and CHIPRS. We then added additional datasets that were not evaluated globally before. The length requirement stems from our interest in examining long-term changes in river flows, including droughts and floods, globally. In line with the length

criterion, we have added a few lines explaining why we chose datasets greater than 30 years.

Line 130-136: It is not entirely clear which version of the set has been used. Presumably ERA5-Land? Why was it selected and was it used/evaluated in previous studies?

Authors' response:

- It is correct. We have used ERA5-Land due to the improvements compared to ERA5, including the spatial resolution, and because it was not evaluated globally for hydrological modelling together with other datasets such as MSWEP and CHIRPS. To make this clearer, we have edited lines 130-136.

Line 137-147: Which version has been used and at what resolution? Why was CHIRPS selected for evaluation?

Authors' response:

- Thank you for bringing this to our attention. We utilized version 2.0 of CHIRPS with a spatial resolution of 0.05°. The selection of CHIRPS was based on its continued development and widespread use in various studies. Additionally, its performance, as recommended in a previous study by Beck et al. (2017a), demonstrated effectiveness across different basins worldwide.

Line 148-161: The description of the set is very detailed and I recommend to re-consider listing all the different data sets which were combined to create MSWEP. Instead you could provide information on which temporal resolution was selected and why this set was chosen for evaluation.

Authors' response:

- Thank you for your suggestion. We have revised the section by providing detailed information on the spatial and temporal resolution of MSWEP and explaining the reasons for its selection in the evaluation.

Line 162-168: Why was TERRAClimate selected for evaluation? Has it been used in other studies?

Authors' response:

- Thank you for your inquiry. TERRA Climate was included in the study due to its very high resolution (~4 km), making it suitable for detailed hydrological modelling. It had not been previously compared with other datasets for hydrological modelling and its performance in a global context was not well-known. Despite not being as widely used as ERA5, MSWEP, and CHIRPS, its exceptional spatial resolution made it a potential candidate for evaluation in this study.

Line 169-174: Why was CPCU selected, what is the temporal and spatial resolution of this set? Has it been used/evaluated in previous studies?

Authors' response:

- CPCU was chosen for evaluation because it relies on ground observations. Despite the limited global distribution of observed datasets, there was a curiosity to assess how a dataset based solely on ground observations would perform in comparison to datasets that incorporate both observations and satellite data. CPCU has a relatively coarse resolution ( $0.5^\circ$ ) compared to other datasets. It had been previously evaluated by Beck et al. (2017a) on a daily time scale, and in this study, an examination was conducted to see how CPCU performs on monthly and annual time scales, as well as in extreme conditions.

Lines 121-184 Section 2.1: The section provides a description of the sets (some more extensive than others) but does not provide any information on how the sets were prepared for use in the hydrological model. As the model was run at daily time steps and  $0.1^\circ$  resolution I assume that most of the sets were interpolated to the model's resolution?. Furthermore, there is no information provided on how the monthly data in TERRA was converted to daily data.

Authors' response:

- Thank you for bringing this to our attention. The datasets were indeed interpolated to a resolution of  $0.1^\circ$  within the hydrological model. **We have added a brief explanation on how the datasets were prepared for the hydrological model, including details on the interpolation method used in section 2.1.**
- Regarding TERRA, we have clarified that the model was run on both daily and monthly time steps. However, for TERRA, the assessment was conducted only on monthly and annual time scales, as the model did not evaluate its performance on a daily basis.
- The hydrological model can implement temporal downscaling (monthly to daily) using input daily rainfall characteristics from other datasets. Although this is a common practice in hydrological modelling, especially in data-sparse regions, it does not replace the original data. Therefore, we have decided not to evaluate TERRA on a daily basis and for daily extremes

Line 194: What does high-resolution mean in this context? Is it finer, equal or coarser than the  $0.1^\circ$  resolution at which the model was run?

Authors' response:

- Thank you. The resolution of the river network we used is  $0.1^\circ$ . For clarity, we have removed the term "high resolution" and added information about the resolution of the river network used within the model.

Lines 196-201: It is unclear which sets have been used to drive the model. Please, provide a table listing all the data sets and where to obtain them. Has the model been calibrated? Which parameter sets were used?

Authors' response:

- Thank you for the suggestion. We have added a table listing the datasets used to drive the model, in addition to the precipitation sets, instead of referring to the paper (Cohen et al., 2013). As we tried to explain in lines 208-209, the model is calibrated globally and shows an  $R^2$  of 0.99 for the long-term average (Cohen et al., 2022). We have now included a brief explanation of the parameters used in the calibration of the model.

Lines 202-204: It is mentioned that the option to disaggregate TERRA from monthly to daily time steps was not used. If that is the case, I wonder how the model could be run at daily time steps. Was another method used for disaggregation?

Authors' response:

- As explained earlier, the model can run on both daily and monthly time steps depending on data availability. Therefore, we ran the model using both daily and monthly time steps. We have included a line to clarify this in the revised version.

Lines 205: The model was run at  $0.1^\circ$  resolution but several of the evaluated precipitation sets have a different resolution. How was this mismatch addressed? Did you apply any interpolation?

Authors' response:

- We hope this is clear now. As mentioned earlier, yes, we interpolated all the datasets to  $0.1^\circ$  within the model. A brief explanation has been added in section 2.1 for clarity.

Lines 208-209: The last sentence in this section (Cohen et al. (2022) report ... ) should be removed. It could be used in the discussion section.

Authors' response:

- Thank you for the suggestion. We have removed and moved it to the discussion section as recommended.

Lines 211-218: How were the stations selected? Were stations limited to those with a record of > 10 years? Were gaps allowed in the record? Will a list of the stations be provided? As 11 authors claim to have performed extensive quality control, at least one full paragraph outlining the steps involved should be provided.

Authors' response:

- Thank you for the suggestion. Yes, we only consider stations with at least 10 years of record and gaps were allowed in the record. Processing the datasets for the evaluation was a time-consuming task, and we decided to split the jobs between the co-authors. If a list of stations is required, we are happy to supply it at any time but they are also available on GRDC with full details.
- As per your recommendation, we have now added lines explaining the quality control, including the criteria for station selection based on length and data gaps.

Lines 237-239: I recommend to remove these two sentences.

Authors' response:

- Thank you for the suggestion. The sentence is now removed.

Lines 259-261: Does the figure show monthly or annual CC values in the histograms? I assume the 'yellow' line refers to the 'orange' or 'light red' line in the inset?

Authors' response:

- Thank you for pointing this out. Figure 1 represents the annual CC. We have changed the vertical line to yellow and modified the text as follows: "*The inset histograms show the frequency distribution of the annual CC, with the yellow vertical line indicating the median value.*"

Lines 265-267: The description reads 'values lower than -1 are highlighted in yellow' but I cannot see any yellow highlights, just an 'orange' bar and an 'orange' line. Furthermore, the highlighted bars seem to refer to values between -0.8 and -1.0 rather than to those < -1.

Authors' response:

- Thank you. We have changed the bar to red and the line to yellow. Additionally, we modified the axis to clearly indicate the values below -1.

Line 268 (Figure 3): I understand the reason behind presenting this map but it is really hard to see what is going on. Maybe limiting the presentation to areas in which there are clear differences between the datasets would be better?

Authors' response:

- Thank you for the suggestion. We agree and have added additional maps to highlight specific areas with clear differences, focusing on large river basins such as in South America (Amazon), Europe (Danube), USA (Mississippi), Africa (Orange), Asia (Mekong), and Australia (Murray-Darling).

Lines 280-282: 'Yellow' looks actually 'orange', see above.

Authors' response:

- Thank you. This is now modified.

Lines 292-296: The same issue as in Lines 265-267.

Authors' response:

- Thank you. This is now modified as recommended.

Line 312 (Figure 6): This figure is really difficult to read. I would suggest to remove the annotation stating the catchment area as this information is already provided in Table 2 and

because it distracts from the time series. Can the readability be increased by showing one single time series per row and increasing the height of the figure?

Authors' response:

- Thank you for the recommendation. We have removed the text from the figures and increased the height.

Line 327 (Figure 7): Yellow' looks 'orange', see above.

Authors' response:

- Thank you. This is now modified.

Line 330 (Figure 8): Yellow' looks 'orange', see above.

Authors' response:

- Thank you. This is now modified.

Line 349 (Figure 9): I have a hard time understanding what is going on in this figure. Reading the description I was expecting much less cluttered plots than presented. Why are there so many points per catchment? On what time scale did you actually calculate the extremes? I suggest, you add a section in the methods detailing the calculation of your Q10/Q90 to clarify potential misunderstandings. Furthermore, I suggest to remove the annotations presenting the lat, lon and area information as this is already given in Table 2 and is unnecessary here.

Authors' response:

- Thank you for your feedback. We have removed the text from the figures and added a detailed description in the methods section regarding the calculation of Q10 and Q90 to avoid potential misunderstandings. Additionally, we have enhanced the figure quality for better clarity.

Line 355-372: I suggest to remove this paragraph and put it into the introduction instead to provide more background information.

Authors' response:

- Thank you for your suggestion. We have incorporated your feedback and moved the section to the introduction.

Line 373-374: This first sentence (In light of the above ... for global hydrological modelling) better suits the introduction as it outlines the aim of the study.

Authors' response:

- Thank you. We have moved this to the introduction.

Lines 374-376: This is a crucial bit of information which I was looking for in the methodology (It is important to note ... replicating observed river discharge). It should be placed into the section describing the model setup.

Authors' response:

- Thank you. We have updated the methodology section to include the information in the method section.

Lines 376-387: This sentence (Within this context ... various precipitation sets.) would be better placed into the introduction, outlining the objectives of the study.

Authors' response:

- Thank you for your suggestion. We have updated this as recommended.

Lines 379-380: This sentence (Based on the evaluation ... better than other datasets) is an excellent opening sentence for the discussion section.

Authors' response:

- Thank you. We have moved the sentence to the opening of the discussion section as recommended.

Line 400-401: Why is it necessary to present a new figure here? The variability in performance has already been shown in Figure 3. This last sentence should be removed.

Authors' response:

- We added the figure to enhance the discussion and provide readers with a summary without requiring them to refer back to the previous figures.
- We have removed the last sentence, Lines 400-401.

Line 402 (Figure 10): I do not think that this figure provides anything that has not yet been covered by the other figures. Better place it into the supplemental material.

Authors' response:

- We have moved Figure 10 to the supplemental material as recommended. Thank you!

### **Technical corrections:**

Line 33: Remove comma after 'Whilst'

Authors' response:

- "Whilst" is removed from the text.

Line 99: This is the first time ERA5 is mentioned in the main body and the acronym hence needs explaining. Should be changed to 'such as ECMWF Reanalysis v5 (ERA5)'

Authors' response:

- Thank you! The revised version now includes the full name, "the fifth generation of the European Centre for Medium-Range Weather Forecasts (ECMWF) Atmospheric Reanalysis (ERA5)."

Line 101: Is it PERCCDR (as in the abstract and methods) or PERSIANN-CCS-CDR?  
Please, double check consistency of acronyms.

Authors' response:

- You are right; it is PERSIANN-CCS-CDR. However, for shortness, we have used the acronym PERCCDR while retaining the full name of the precipitation product, '*Precipitation Estimation from Remotely Sensed Information using Artificial Neural Networks-Cloud Classification System-Climate Data Record*'.

Line 123-127: Some of the acronyms have already been defined in Lines 99-101 and do not need to be defined again.

Authors' response:

- Thank you! We have modified this section as recommended by removing the long names.
